# Supplementary material
Source: publisher figshare collection journal article supplement (https://diabetesjournals.figshare.com/articles/dataset/_/27233751)
Supplement: Supplementary file 2 [file 1]

## **Research Design and Methods**

### **Clinical Assessments and Definitions**

Fasting blood glucose, measured by the central laboratory of Heidelberg University Hospital, was recorded for all individuals in the study to assess short-term glycaemic control, while glycated haemoglobin (HbA1c) data were not available for all participants. The presence of complications, including cardiovascular disease (CVD), retinopathy, nephropathy, neuropathy, and ischemia/infection, was evaluated for each individual. CVD was defined by the presence of one or more of the following conditions: a history of myocardial infarction (>6 months prior), diagnosed coronary heart disease, percutaneous transluminal coronary angioplasty (PTCA) with stent placement, or current treatment for hypertension. These conditions were identified through a review of patient medical records. Retinopathy was diagnosed using fundoscopy. Nephropathy was assessed by calculating the estimated glomerular filtration rate (eGFR) using the Chronic Kidney Disease Epidemiology Collaboration (CKD-EPI) formula, with a cutoff of <60 mL/min/1.73 m<sup>2</sup> used to define nephropathy (1). Neuropathy was assessed using the Neuropathy Disability Score (NDS) and Neuropathy Symptom Score (NSS), following the guidelines of the German Diabetes Association (2). Ischemia and infection were classified as either localized (restricted to the affected limb) or systemic (involving generalized symptoms). The severity of ischemia was determined through clinical evaluation, with patient records reviewed for details of any prior interventions, such as revascularization or antibiotic therapy.

### **Electron microscopy**

Isolated fascicles were cut into longitudinal segments (1 x 2 mm) and processed as previously described (3). Briefly, the dissected tissue was fixed for at least two hours at room temperature in a solution of 3% glutaraldehyde and 3% sucrose in Sörensen buffer. The tissue was then washed in Sörensen buffer and post-fixed for two hours at 4°C in 1% osmium tetroxide. The fixated tissue was then rinsed in water, dehydrated through graded ethanol solutions, transferred into propylene oxide, and embedded in epoxy resin (glycidether 100/araldit). Semithin and ultrathin sections were cut with an ultramicrotome (Reichert Ultracut E, Wien, Austria). Ultrathin sections were treated with uranyl acetate and lead citrate, and examined with a transmission electron microscope Jem1400 (JEOL) equipped with a F216 TVIPS digital camera. Ultrastructural features were visually assessed by an expert neuropathologist (J. W.).

### **MRI data acquisition**

Images were acquired in axial orientation to the long axis of the nerve specimens. The MR protocol included the following sequences:

At 3 T MRI clinical resolution to match *in vivo* imaging findings:

1. High-resolution T2-w turbo-spin-echo (TSE) sequence at 3 T to match: 2D sequence, TE: 55 ms, TR: 7570 ms, echo train length: 13, spectral fat saturation, Field-of-View (FoV): 120 x 120 mm<sup>2</sup>, acquisition matrix: 512 x 333, number of slices: 41, slice thickness: 3 mm, number of averages: 3, acquisition time: 04 min 48 s.

At 9.4 T ultrahighfield-MRI to precisely guide and localize lesioned fascicles:

1. High-resolution Rapid Acquisition with Refocused Echoes (RARE) T2-w sequence: 2D sequence, echo time (TE): 40 ms, repetition time (TR): 2500 ms, 47 µm in plane resolution, acquisition matrix: 512 x 212, slice thickness: 1 mm, rare factor 4, number of averages: 2, duration: 4 min 35 s.
2. DTI-spin echo sequence: 2D sequence, number of diffusion gradient directions: 18 + 5 A0 images, TE: 18.1 ms, TR: 1200 ms, 100 µm x 128 µm in plane resolution, acquisition matrix: 120 x 50, b-values: 0/650 s/mm<sup>2</sup>, gradient duration: 2.5 ms, gradient separation:

15.5 ms, flip angle: 130°, spectral fat saturation, slice thickness: 1.5 mm, number of averages: 1, duration: 23 min 05 s.

3. Multi-Slice-Multi-Echo (MSME) sequence: 2D sequence, TE: 9.7 ms, number of echoes: 20, TR: 3200 ms, 80  $\mu$ m in plane resolution, acquisition matrix: 300 x 127, slice thickness: 1 mm, number of averages: 1, duration: 7 min 12 s.
4. T1-w Fast Low-Angle Shot (FLASH) sequence: 2D sequence, TE: 4.7 ms, TR: 350 ms, 47  $\mu$ m in plane resolution, acquisition matrix: 277 x 161, slice thickness: 1 mm, flip angle: 40°, Magnetization Transfer (MT)-pulse: 15  $\mu$ T, number of averages: 2, duration: 1 min 51 s (2x; MT-pulse on/off).

### **MRN Image Post-processing and Analysis**

Apparent diffusion coefficient (ADC), fractional anisotropy (FA), radial diffusivity (RD), axial diffusivity (AD), magnetization transfer contrast (MTC), and T2-Time maps were calculated using a custom-written Matlab routine (R2015a, MathWorks Inc., Natwick, USA) as reported previously (3). MRN images were exported, and evaluation was performed in ImageJ/Fiji (4), as described previously (3,5). Subsequently, all individual nerve fascicles were segmented manually and segmented fascicles were further subjected to quantitative analysis of T2-time. For an unbiased classification of fascicular nerve lesions within the entire sample, a two-component Gaussian-Mixture-Model (GMM) was fitted to the overall distribution using Matlab. Based on this analysis, nerve fascicles were classified as either “non-lesioned fascicles (NLF)” or “lesioned fascicle (LF)”.

### **Nerve Dissection & Histological examination**

Following MRN, the sciatic nerve samples were again placed on ice. The positional information of the lesion(s) obtained from the MRN was then used to guide the precise sectioning of the tissue. The region containing the lesion was then fixated and embedded in paraffin (FFPE). From each sample, sequential five-micron sections were made in which every fifth section was stained with hematoxylin and eosin (HE) and Alcian blue/periodic acid–Schiff (AB-PAS). Images were acquired using an Aperio AT2 System (Leica) and were exported and evaluated using ImageJ/ Fiji (4). The light microscopy and MRN images were aligned to establish whether the correct section(s) has been cut with respect to the presence or absence of the lesion(s). Perineural thickness and the fascicular area were measured using the standard annotation and segmentation tools, whilst a semi-quantitative AB-grade from 1 to 4 (“1”: absence of AB-positive streaks or areas; “2”: minor AB-positive streaks or areas; “3”: substantial AB-positive streaks or areas; “4”: (Sub-)total filling with AB-positive areas) was assigned to each fascicle depending on the degree of AB-positivity.

### **Immunofluorescence Staining**

FFPE sections (5 $\mu$ m) containing the LF were stained for the following nerve fiber markers, as previously described (6): neurofilament light (NFL, Cell Signaling, 2835; 1:100), PGP9.5 (Merck, AB1761-I; 1:500) and myelin basic protein (MBP, Abcam, ab62631; 1:200). Each marker was visualized with either anti-mouse or anti-rabbit Alexafluor488 (1:1000; Cell Signaling) and counterstained with DAPI. Fluorescent images were acquired on a Nikon A1R confocal microscope and were exported and evaluated using ImageJ/ Fiji (4). For determination of the number and size of the axons, frequency distribution analysis was performed, fitting that data to a non-Gaussian curve to determine the number of the axons (=amplitude) and the size (=geometric mean).

### **Sample processing**

Following laser dissection, collected samples underwent antigen retrieval followed by reduction/alkylation/reduction. Two steps of digestion in highly concentrated trypsin solutions

(Thermo/Pierce) were performed in the presence of 0.01% Rapigest (Waters, Milford, MA, USA). The first step of digestion was performed in a solution of trypsin at 60 µg/ml, prepared in 50mM ammonium hydrogen carbonate. The second step was performed in a solution of 30 µg/ml trypsin in 80% acetonitrile (ACN). After digestion, the samples were dried by vacuum centrifugation and desalted using C18 Solid Phase Extraction tips (ZipTip, Merck Millipore, Burlington, MA, USA). The peptides were eluted using 50% of ACN in acidified water (0.1% trifluoroacetic acid in final concentration) and dried, ready for analysis by liquid chromatography–tandem mass spectrometry.

### Data Processing & Pathway Analysis

Processing of the raw data was carried out by MaxQuant (version 1.6.14.0)(7), using a human reference proteome database (February 27, 2020; 74 811 entries) extracted from Uniprot.org under default settings. Identification FDR cutoffs were 0.01 on peptide level and 0.01 on protein level. Match between runs option was disabled. Quantification was done using a label free quantification (LFQ) approach based on the MaxLFQ algorithm (8). A minimum of 2 unique peptides per protein was required for protein quantification. The LFQ intensities for the identified proteins were log 2 transformed and visualized as a heat map, and clustering was performed by R software packages, tidyverse and pheatmap. The fold changes (FC) of the proteins were calculated by comparing the NLF-T2D or LF-T2D to NLF-Ctrl. The comparison of more than one group was achieved using two-way ANOVA analysis, correcting for multiple comparisons by controlling the false discover rate (FDR; <0.05). Volcano plots were used to visualize these differences in which the cutoffs used to significantly changed proteins was  $-\log_{10}(\text{adjusted p-value}) > 1.30$  and  $-2 \leq \text{FC} \leq 2$ . Interaction analyses were performed using STRING (<https://string-db.org/>). The finalized proteomic data set(s) were submitted into Ingenuity Pathway Analysis (IPA) for core analysis (Ingenuity Systems, Redwood City, CA). For canonical pathway analysis, disease and function, the  $-\log(\text{P-value}) > 2$  was taken as threshold, the Z-score  $> 2$  was defined as the threshold of significant activation, whilst Z-score  $< -2$  was defined as the threshold of significant inhibition.

### Statistical analysis

For statistical analysis Prism Version 7.02 (GraphPad Software Inc., La Jolla, USA), Microsoft Excel 2016 (Microsoft Inc., Redmond, USA) and custom-written routines in MatLab (R2015a, MathWorks Inc., Natwick, USA) were employed. Unless otherwise stated, data is expressed as the mean  $\pm$  S.D. Group statistics were calculated using unpaired nonparametric Kolmogorov-Smirnov test: \*= $p < 0.05$ , \*\*= $p < 0.01$ , \*\*\*= $p < 0.001$ , \*\*\*\*= $p < 0.0001$ , n.s.=non-significant. Correlation tables were calculated using non-parametric Spearman's  $r$  at a significance level of  $p < 0.05$ .

### References

1. Levey AS, Stevens LA, Schmid CH, Zhang Y (Lucy), Castro AF, Feldman HI, et al. A New Equation to Estimate Glomerular Filtration Rate. *Ann Intern Med.* 2009 May 5;150(9):604.
2. Bundesärztekammer (BÄK), Kassenärztliche Bundesvereinigung (KBV), Arbeitsgemeinschaft der Wissenschaftlichen Medizinischen Fachgesellschaften (AWMF). Nationale VersorgungsLeitlinie Neuropathie bei Diabetes im Erwachsenenalter—Langfassung. 1. Auflage. Version 5. 2011.
3. Schwarz D, Hidmark AS, Sturm V, Fischer M, Milford D, Hausser I, et al. Characterization of experimental diabetic neuropathy using multicontrast magnetic resonance neurography at ultra high field strength. *Sci Rep.* 2020 May 5;10(1):7593.
4. Schindelin J, Arganda-Carreras I, Frise E, Kaynig V, Longair M, Pietzsch T, et al. Fiji: an open-source platform for biological-image analysis. *Nat Methods.* 2012 Jul 28;9(7):676–82.

5. Pham M, Oikonomou D, Bäumer P, Bierhaus A, Heiland S, Humpert PM, et al. Proximal Neuropathic Lesions in Distal Symmetric Diabetic Polyneuropathy. *Diabetes Care*. 2011 Mar 1;34(3):721–3.
6. Morgenstern J, Groener JB, Jende JME, Kurz FT, Strom A, Göpfert J, et al. Neuron-specific biomarkers predict hypo- and hyperalgesia in individuals with diabetic peripheral neuropathy. *Diabetologia*. 2021 Dec 3;64(12):2843–55.
7. Tyanova S, Temu T, Cox J. The MaxQuant computational platform for mass spectrometry-based shotgun proteomics. *Nat Protoc*. 2016 Dec 27;11(12):2301–19.
8. Cox J, Hein MY, Luber CA, Paron I, Nagaraj N, Mann M. Accurate Proteome-wide Label-free Quantification by Delayed Normalization and Maximal Peptide Ratio Extraction, Termed MaxLFQ. *Molecular & Cellular Proteomics*. 2014 Sep;13(9):2513–26.

**Supplementary Table & Figures:** *In order of citation in the main text*

**Supplementary Figure 1.** Schematic illustrating experimental workflow in the analysis of peripheral nerve lesions in DN. IHC: Immunohistochemistry; IF: Immunofluorescence.

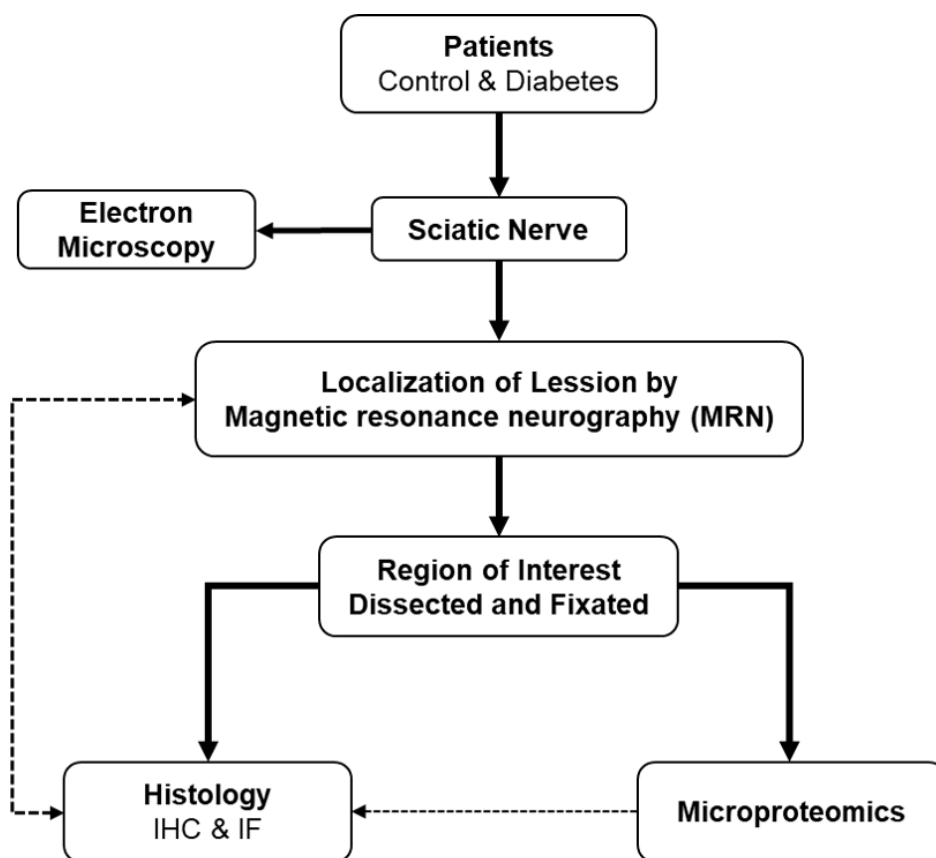

**Supplementary Figure 2.** Light microscopy of resin semithin sections of non-diabetic (a) and T2D (b-d) cases.

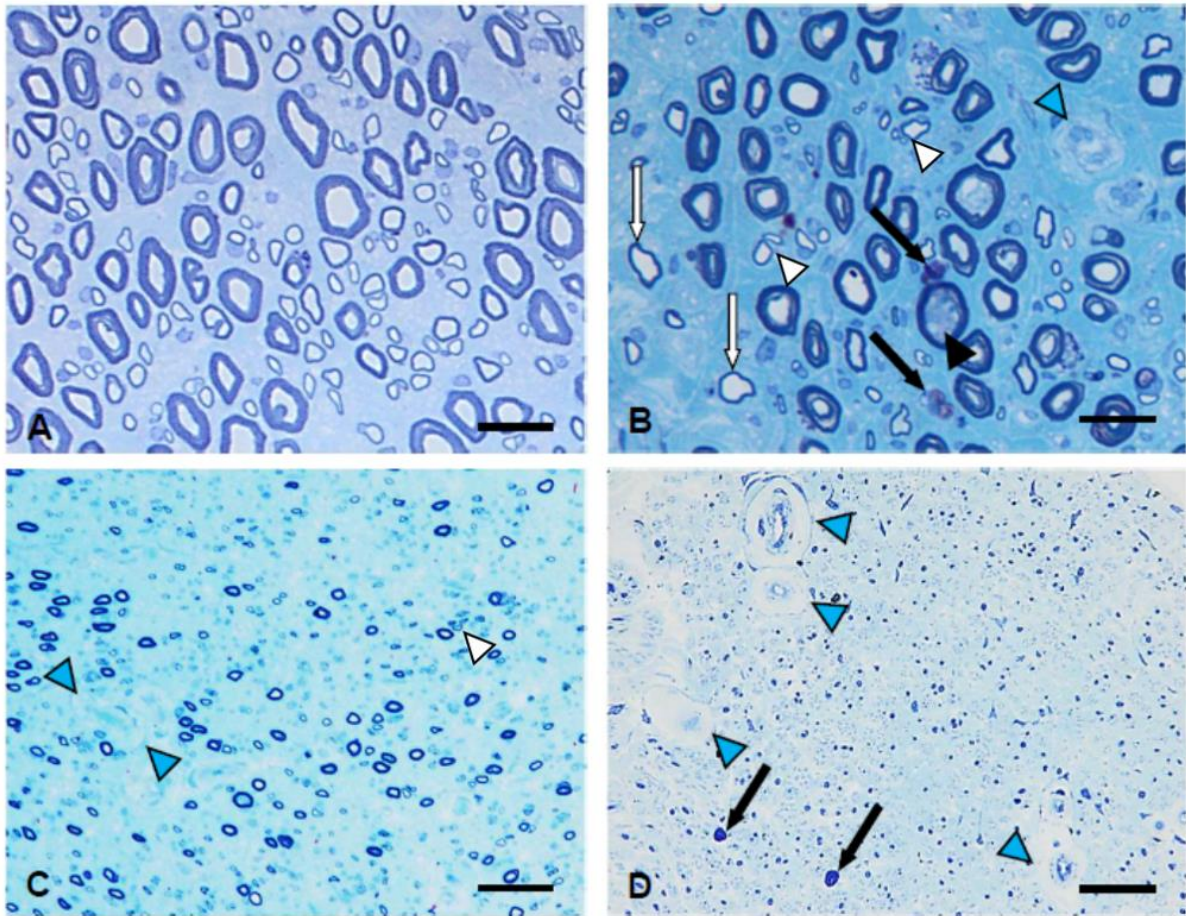

Non-diabetic case (amputation of the leg after accident). Normal density of large and small myelinated fibers. Scale bar = 5  $\mu\text{m}$  (a). T2D case still minor, but progressive neuropathy, predominantly axonal. Approx. 30 % loss of large myelinated nerve fibers. Black arrowhead: axonal degeneration. Several myelin ovoids and macrophages with myelin breakdown products indicative of recent nerve fiber breakdown (black arrows). Several clusters of regenerating nerve fibers (white arrowheads) as well as axons with disproportionately thin myelin sheaths (white arrows), probably corresponding to late stage regenerating nerve fibers or secondary demyelination. Splitting of the myelin sheaths due to delayed fixation. Minor thickening of endoneurial vessel walls (blue arrowhead). Considerable endoneurial fibrosis, minor edema. Scale bar = 5  $\mu\text{m}$  (b). T2D with moderately-to-severe, chronically neuropathy. Loss of 50-60% of large myelinated nerve fibers in a patchy distribution. Few groups of regenerated nerve fibers (white arrowhead). Moderate thickening of endoneurial vessel walls (blue arrowheads). Scale bar = 15  $\mu\text{m}$  (c). T2D End stage neuropathy with complete loss of myelinated nerve fibers. Few myelin breakdown products (arrows). Marked thickening and hyalinization of the walls of endoneurial blood vessels (blue arrowheads). Scale bar = 15  $\mu\text{m}$  (d).



**Supplementary Figure 3.** Electron microscopy (EM) of non-diabetic (a) and T2D (b-g) cases.

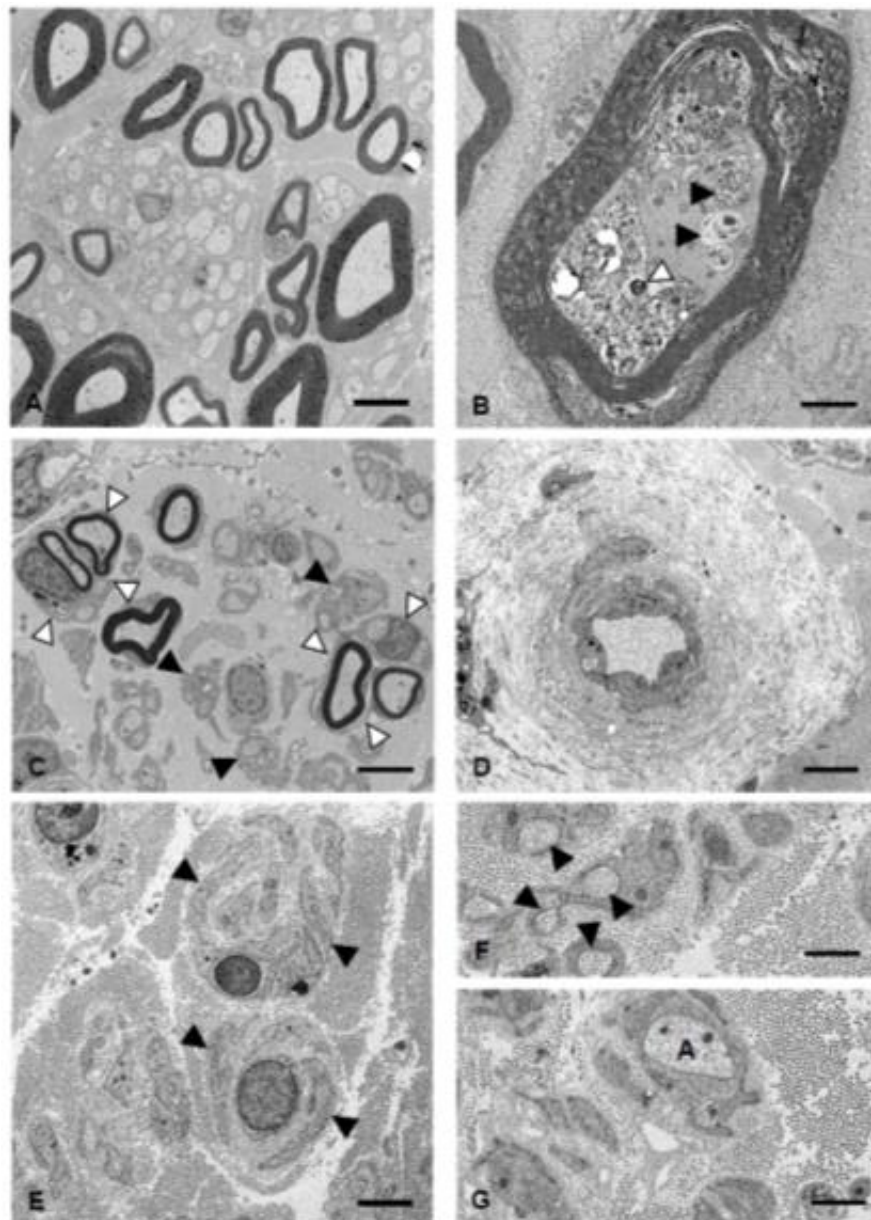

Non-diabetic case showing normal myelinated and unmyelinated nerve fibers at a normal density. Normal endoneurial collagen deposition. Scale bar = 3  $\mu\text{m}$  (a). T2D with accumulation of membranous granular and membranous debris in abnormal autophagic vacuoles within an axon (black arrowheads) and in the adaxonal Schwann cell cytoplasm (white arrowhead). Scale bar = 0.8  $\mu\text{m}$  (b). T2D Considerable decrease in myelinated and unmyelinated nerve fiber density. Considerable endoneurial fibrosis. Remak bundles showing reduced numbers of unmyelinated axons (black arrowheads). Two groups of regenerated nerve fibers (white arrowheads). Scale bar = 5  $\mu\text{m}$  (c). Prominent thickening of the wall of an endoneurial blood vessel due to basal lamina reduplication and deposition of collagen fibers. Scale bar = 3  $\mu\text{m}$  (d). Denervated Schwann cell bands (arrowheads). Marked endoneurial fibrosis. Scale bar = 2  $\mu\text{m}$  (e). Collagen pockets (arrowheads) indicative of unmyelinated nerve fiber loss. Scale bar = 1  $\mu\text{m}$  (f). One of the very few remaining unmyelinated axons (a) in this nerve which is otherwise almost completely devoid of nerve fibers. Scale bar = 1.2  $\mu\text{m}$  (g).

**Supplementary Table 1.** Quantification and Correlations of Morphological and MRN Characteristics of non-lesioned fascicles (NLF) and lesioned fascicles (LF) (*Associated with Figure 1 & Figure 2*).

| Parameter                                                                     | NLF                 | LF                    | P-Value | Pearson correlation coefficient (r) for T2-time |
|-------------------------------------------------------------------------------|---------------------|-----------------------|---------|-------------------------------------------------|
| Fascicle Area ( $\mu\text{m}^2$ )                                             | 778646 $\pm$ 773653 | 3659718 $\pm$ 1380112 | <0.001  | 0.541<br>P <0.0001                              |
| Perineurium-to-fascicle ratio                                                 | 0.254 $\pm$ 0.07    | 0.107 $\pm$ 0.02      | <0.001  | -0.542<br>P= 0.0001                             |
| AD-PAS Grade                                                                  | 1.87 $\pm$ 0.90     | 3.76 $\pm$ 0.43       | <0.001  | 0.502<br>P <0.0001                              |
| T2-time (ms)                                                                  | 25.4 $\pm$ 4.65     | 46.5 $\pm$ 5.52       | <0.001  |                                                 |
| Fractional Anisotropy (FA)                                                    | 0.342 $\pm$ 0.06    | 0.197 $\pm$ 0.06      | <0.001  |                                                 |
| Apparent Diffusion Coefficient (ADC; $\times 10^{-3} \text{ mm}^2/\text{s}$ ) | 0.0013 $\pm$ 0.0003 | 0.0018 $\pm$ 0.0001   | <0.001  |                                                 |
| Magnetization Transfer Contrast (MTC)                                         | 0.196 $\pm$ 0.03    | 0.151 $\pm$ 0.03      | <0.001  |                                                 |
| PGP9.5 <sup>+</sup> Axons (Diameter-to-Number Ratio)                          | 45.7 $\pm$ 9.2      | 54.3 $\pm$ 27.1       | >0.999  |                                                 |
| MBP <sup>+</sup> Axons (Diameter-to-Number Ratio)                             | 52.2 $\pm$ 27.4     | 11.8 $\pm$ 8.02       | <0.0001 |                                                 |
| NFL <sup>+</sup> Axons (Diameter-to-Number Ratio)                             | 24.0 $\pm$ 9.61     | 16.2 $\pm$ 6.71       | <0.05   |                                                 |



**Supplementary Figure 4.** Total number of proteins quantified and their respective subcellular location in the NLF-Ctrl, NLF-T2D and LF-T2D **(a)**. The classification and relative distribution of the functions of the proteins quantified in each of the groups **(b)** (*Associated with Figure 3*).

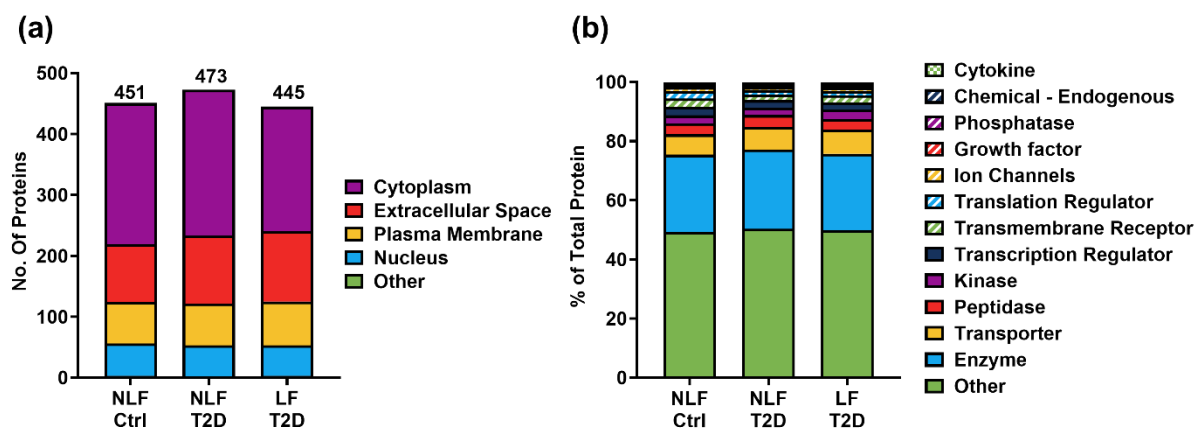

**Supplementary Information:** Schwarz et al., Exploring Structural and Molecular Features of Sciatic Nerve Lesions in Diabetic Neuropathy: Unveiling Pathogenic Pathways and Targets

**Supplementary Table 2.** List of differentially changed proteins in NLF-T2D fascicles with respect to NLF-Ctrl (*Associated with Figure 3c*).

| Protein Name                          | Symbol   | Location            | Type(s)     | Log <sub>2</sub> [FC] | Adjusted P-value |
|---------------------------------------|----------|---------------------|-------------|-----------------------|------------------|
| <b>Upregulated</b>                    |          |                     |             |                       |                  |
| Hemoglobin subunit alpha 2            | HBA1     | Extracellular Space | Transporter | 2.364                 | 3.09E-09         |
| Complement factor B                   | CFB      | Extracellular Space | Peptidase   | 1.549                 | 3.16E-06         |
| Serpin family A member 1              | SERPINA1 | Extracellular Space | Other       | 1.266                 | 7.91E-04         |
| Transferrin                           | TF       | Extracellular Space | Transporter | 1.109                 | 2.51E-04         |
| <b>Downregulated</b>                  |          |                     |             |                       |                  |
| Ferritin light chain                  | FTL      | Cytoplasm           | Enzyme      | -1.164                | 1.42E-03         |
| Immunoglobulin heavy constant alpha 1 | IGHA1    | Extracellular Space | Other       | -1.979                | 1.81E-09         |

**Supplementary Table 3a.** List of differentially changed proteins in LF-T2D with respect to NLF-Ctrl (*Associated with Figure 3c*). Proteins highlighted in bold were also identified in the comparison with NLF-T2D.

| Protein Name                                   | Symbol       | Location                   | Type(s)               | Log <sub>2</sub> [FC] | Adjusted P-value |
|------------------------------------------------|--------------|----------------------------|-----------------------|-----------------------|------------------|
| <b>Upregulated</b>                             |              |                            |                       |                       |                  |
| Hemopexin                                      | HPX          | Extracellular Space        | Transporter           | 2.558                 | 1.21E-04         |
| <b>Alpha-1-microglobulin/bikunin precursor</b> | <b>AMBP</b>  | <b>Extracellular Space</b> | <b>Transporter</b>    | <b>2.103</b>          | <b>1.54E-11</b>  |
| Orosomucoid 2                                  | ORM2         | Extracellular Space        | Other                 | 1.738                 | 1.73E-02         |
| Vitronectin                                    | VTN          | Extracellular Space        | Other                 | 1.645                 | 1.00E-15         |
| Orosomucoid 1                                  | ORM1         | Extracellular Space        | Other                 | 1.615                 | 4.86E-03         |
| Complement C3                                  | C3           | Extracellular Space        | Peptidase             | 1.461                 | 1.00E-15         |
| Abhydrolase domain containing 14B              | ABHD14B      | Cytoplasm                  | Enzyme                | 1.331                 | 1.11E-07         |
| Serpin family F member 1                       | SERPINF1     | Extracellular Space        | Other                 | 1.245                 | 1.96E-07         |
| Transaldolase 1                                | TALDO1       | Cytoplasm                  | Enzyme                | 1.151                 | 4.04E-03         |
| <b>Downregulated</b>                           |              |                            |                       |                       |                  |
| Heat shock protein family D (Hsp60) member 1   | HSPD1        | Cytoplasm                  | Enzyme                | -1.019                | 1.90E-05         |
| Aldolase, fructose-bisphosphate A              | ALDOA        | Cytoplasm                  | Enzyme                | -1.036                | 1.96E-04         |
| Superoxide dismutase, type 1                   | SOD1         | Cytoplasm                  | Enzyme                | -1.041                | 1.97E-04         |
| 10 kDa heat shock protein, mitochondrial       | HSPE1        | Membrane                   | Enzyme                | -1.042                | 3.56E-05         |
| Apolipoprotein D                               | APOD         | Extracellular Space        | Transporter           | -1.044                | 5.53E-04         |
| Ras GTPase-activating-like protein IQGAP1      | IQGAP1       | Membrane                   | Other                 | -1.050                | 1.23E-12         |
| Eukaryotic elongation factor 2                 | EEF2         | Cytoplasm                  | Enzyme                | -1.082                | 3.11E-04         |
| CD59 molecule (CD59 blood group)               | CD59         | Membrane                   | Other                 | -1.085                | 8.82E-05         |
| <b>Biliverdin reductase B</b>                  | <b>BLVRB</b> | <b>Cytoplasm</b>           | <b>Enzyme</b>         | <b>-1.112</b>         | <b>3.88E-05</b>  |
| Tibosomal protein S4 X-linked                  | RPS4X        | Cytoplasm                  | Other                 | -1.135                | 1.66E-04         |
| 60S ribosomal protein L18                      | RPL18        | Cytoplasm                  | Other                 | -1.142                | 9.10E-05         |
| Heat shock protein 90 beta family member 1     | HSP90B1      | Cytoplasm                  | Other                 | -1.149                | 8.72E-07         |
| Crystallin alpha B                             | CRYAB        | Nucleus                    | Other                 | -1.158                | 4.68E-05         |
| Peripheral Myelin Protein 2                    | PMP2         | Extracellular Space        | Other                 | -1.163                | 2.25E-02         |
| 40S ribosomal protein S25 (eS25)               | RPS25        | Cytoplasm                  | Other                 | -1.176                | 3.68E-03         |
| Ribosomal protein SA                           | RPSA         | Cytoplasm                  | Translation regulator | -1.231                | 7.34E-05         |
| Myelin basic protein                           | MBP          | Extracellular Space        | Other                 | -1.257                | 4.09E-02         |
| Heat shock protein family A (Hsp70) member 5   | HSPA5        | Cytoplasm                  | Enzyme                | -1.398                | 1.83E-04         |
| Thioredoxin                                    | TXN          | Cytoplasm                  | Other                 | -1.439                | 2.32E-05         |

**Supplementary Table 3b.** List of differentially changed proteins in LF-T2D with respect to NLF-T2D (*Associated with Figure 3c*). Proteins highlighted in bold were also identified in the comparison with NLF-Ctrl.

| Protein Name                                       | Symbol       | Location                   | Type(s)            | Log <sub>2</sub> [FC] | Adjusted P-value |
|----------------------------------------------------|--------------|----------------------------|--------------------|-----------------------|------------------|
| <b>Upregulated</b>                                 |              |                            |                    |                       |                  |
| Immunoglobulin heavy constant alpha 1              | IGHA1        | Extracellular Space        | Other              | 2.416                 | 1.35E-09         |
| <b>Alpha-1-microglobulin/bikunin precursor</b>     | <b>AMBP</b>  | <b>Extracellular Space</b> | <b>Transporter</b> | <b>1.754</b>          | <b>2.83E-09</b>  |
| Ferritin light chain                               | FTL          | Cytoplasm                  | Enzyme             | 1.614                 | 1.05E-09         |
| Amyloid P component, serum                         | APCS         | Extracellular Space        | Other              | 1.614                 | 1.99E-11         |
| Coagulation factor XIII A chain                    | F13A1        | Extracellular Space        | Enzyme             | 1.257                 | 8.00E-15         |
| Collagen type XII alpha 1 chain                    | COL12A1      | Extracellular Space        | Other              | 1.187                 | 2.37E-07         |
| Immunoglobulin heavy constant gamma 1 (G1m marker) | IGHG1        | Extracellular Space        | Other              | 1.043                 | 3.68E-05         |
| Glutamate dehydrogenase 2, mitochondrial           | GLUD1/2      | Cytoplasm                  | Enzyme             | 1.029                 | 2.74E-08         |
| <b>Downregulated</b>                               |              |                            |                    |                       |                  |
| <b>Biliverdin reductase B</b>                      | <b>BLVRB</b> | <b>Cytoplasm</b>           | <b>Enzyme</b>      | <b>-1.005</b>         | <b>4.07E-05</b>  |
| Aconitase 2                                        | ACO2         | Cytoplasm                  | Enzyme             | -1.095                | 2.92E-05         |
| Hemoglobin subunit alpha 2                         | HBA1         | Extracellular Space        | Transporter        | -2.750                | 1.00E-15         |
| Hemoglobin subunit beta                            | HBB          | Extracellular Space        | Transporter        | -2.938                | 5.41E-04         |

**Supplementary Figure 5.** STRING analysis of the predicted protein-protein interactions and functional clustering of the 17 upregulated proteins specific to LF-T2D (**a**; *Associated with Supplementary Table 4a & 4b*); the 23 downregulated proteins specific to the LF-T2D (**b**; *Associated with Supplementary Table 4a & 4b*); and the 12 upregulated proteins shared by NLF-T2D and LF-T2D, relative to NLF-Ctrl (**c**; *Associated with Supplementary Table 5*). Cluster one is shown in red; Cluster two is shown in green and cluster three is shown in blue.

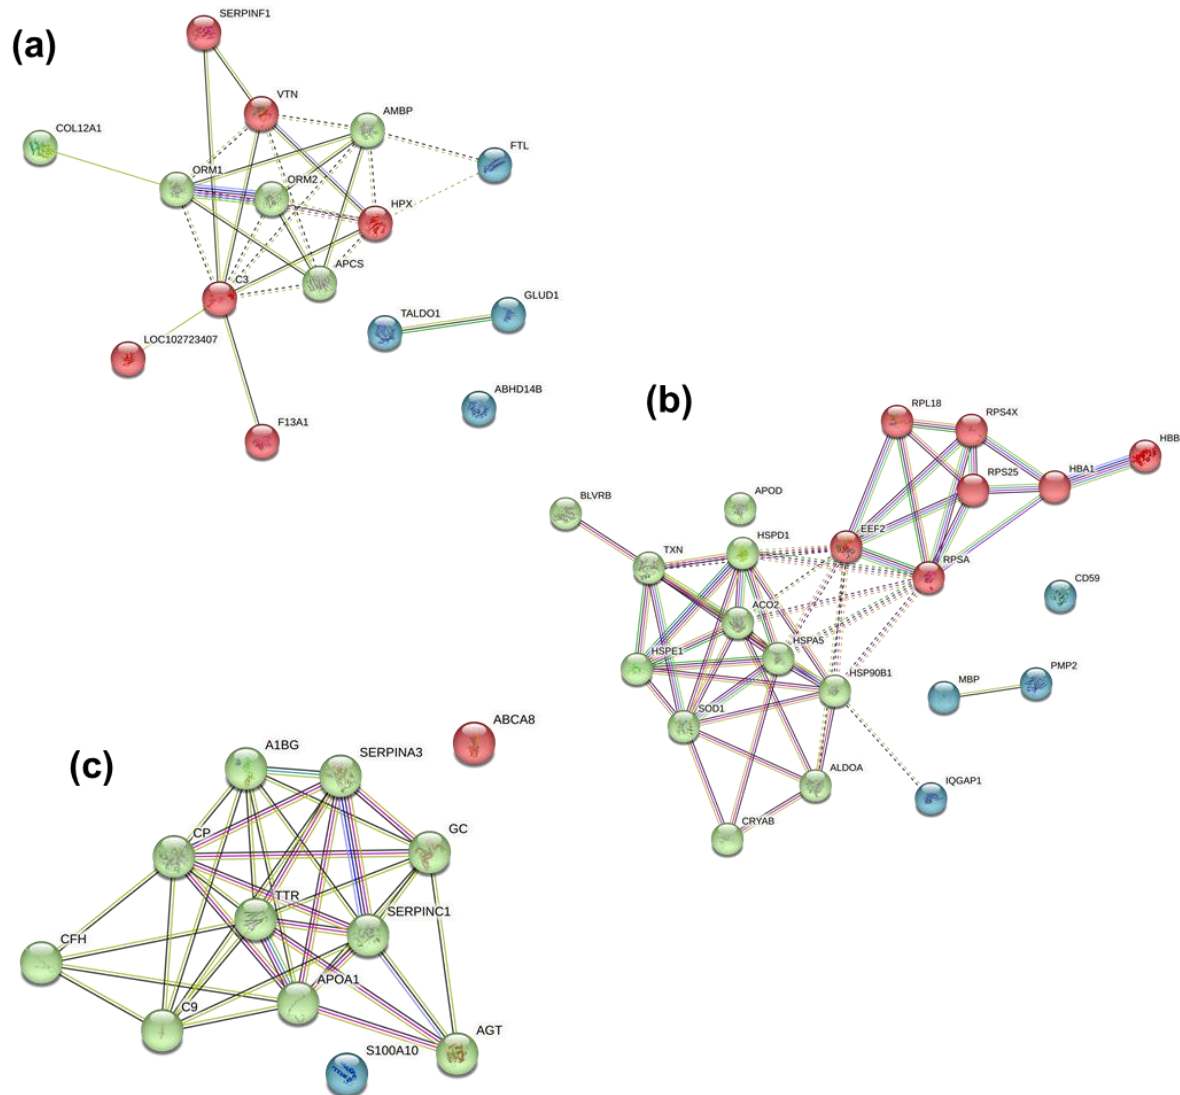

**Legend:**

Red line - indicates the presence of fusion evidence  
 Green line - neighborhood evidence  
 Blue line - cooccurrence evidence  
 Purple line - experimental evidence  
 Yellow line - textmining evidence  
 Light blue line - database evidence  
 Black line - coexpression evidence.

**Supplementary Table 4.** List of differentially changes proteins shared between NLF-T2D and LF-T2D, with respect to NLF-Ctrl (*Associated with Figure 3c*).

| Protein Name                              | Symbol   | Location            | Type(s)       | NLF-Ctrl vs. NLF-T2D  |                  | NLF-Ctrl vs. LF-T2D   |                  |
|-------------------------------------------|----------|---------------------|---------------|-----------------------|------------------|-----------------------|------------------|
|                                           |          |                     |               | Log <sub>2</sub> [FC] | Adjusted P-value | Log <sub>2</sub> [FC] | Adjusted P-value |
| Upregulated                               |          |                     |               |                       |                  |                       |                  |
| Ceruloplasmin                             | CP       | Extracellular Space | Enzyme        | 3.043                 | 1.00E-15         | 3.455                 | 1.00E-15         |
| Apolipoprotein A1                         | APOA1    | Extracellular Space | Transporter   | 1.941                 | 4.10E-07         | 2.214                 | 2.00E-15         |
| GC vitamin D binding protein              | GC       | Extracellular Space | Transporter   | 1.548                 | 7.74E-09         | 1.428                 | 1.98E-12         |
| Transthyretin                             | TTR      | Extracellular Space | Transporter   | 1.524                 | 1.88E-07         | 1.748                 | 5.73E-13         |
| Alpha-1-B glycoprotein                    | A1BG     | Extracellular Space | Other         | 1.463                 | 2.33E-07         | 1.617                 | 4.81E-13         |
| Serpin family C member 1                  | SERPINC1 | Extracellular Space | Enzyme        | 1.258                 | 1.06E-03         | 1.754                 | 1.09E-10         |
| Angiotensinogen                           | AGT      | Extracellular Space | Growth Factor | 1.160                 | 7.25E-03         | 1.203                 | 8.36E-03         |
| Serpin family A member 3                  | SERPINA3 | Extracellular Space | Other         | 1.158                 | 6.08E-04         | 1.172                 | 3.51E-05         |
| ATP binding cassette subfamily A member 8 | ABCA8    | Plasma Membrane     | Transporter   | 1.142                 | 8.17E-05         | 1.380                 | 3.58E-09         |
| Complement factor H                       | CFH      | Extracellular Space | Other         | 1.132                 | 1.39E-07         | 1.523                 | 1.00E-15         |
| Complement C9                             | C9       | Extracellular Space | Other         | 1.128                 | 6.94E-05         | 1.716                 | 7.05E-13         |
| S100 calcium binding protein A10          | S100A10  | Cytoplasm           | Other         | 1.119                 | 3.45E-06         | 1.495                 | 6.30E-14         |
| Downregulated                             |          |                     |               |                       |                  |                       |                  |
| Cathepsin D                               | CTSD     | Other               | Peptidase     | -1.263                | 9.85E-03         | -1.660                | 6.64E-08         |
| Fatty Acid Binding Protein 5              | FABP5    | Cytoplasm           | Transporter   | -1.453                | 8.33E-03         | -1.975                | 2.93E-08         |



**Supplementary Table 5.** Log2 transformed label-free quantification (LFQ) intensities for complement proteins and immunoglobulin subtypes in NLF-Ctrl (N = 5), NLF-T2D (N = 6) and LF-T2D (N=55). Data represents mean  $\pm$  SD; \*\*\*\*P < 0.0001, \*\*P < 0.01, \*P < 0.05 versus NLF-Ctrl; +++P < 0.0001; ++P < 0.01 versus NLF-T2D.

|                                | Log2(LFQ Intensity) |                    |                        |
|--------------------------------|---------------------|--------------------|------------------------|
|                                | NLF-Ctrl            | NLF-T2D            | LF-T2D                 |
| <b>Complement Proteins</b>     |                     |                    |                        |
| <b>C3</b>                      | 28.5 $\pm$ 2.2      | 30.3 $\pm$ 0.4**** | 30.8 $\pm$ 0.5****     |
| <b>C9</b>                      | 24.8 $\pm$ 1.2      | 26.3 $\pm$ 0.4**** | 26.8 $\pm$ 0.5****     |
| <b>CD59</b>                    | 27.2 $\pm$ 0.3      | 27.1 $\pm$ 0.4     | 26.1 $\pm$ 0.4****/+++ |
| <b>Immunoglobulin Subtypes</b> |                     |                    |                        |
| <b>IgG1</b>                    | 30.7 $\pm$ 1.2      | 30.8 $\pm$ 0.3     | 31.9 $\pm$ 0.4****/+++ |
| <b>IgG2</b>                    | 28.4 $\pm$ 1.6      | 28.5 $\pm$ 1.1     | 29.5 $\pm$ 0.7**/++    |
| <b>IgG3</b>                    | 28.7 $\pm$ 1.6      | 28.6 $\pm$ 1.9     | 29.1 $\pm$ 0.7         |
| <b>IgA1</b>                    | 29.5 $\pm$ 1.6      | 28.0 $\pm$ 0.5*    | 30.1 $\pm$ 1.1++++     |

**Supplementary Information:** Schwarz et al., Exploring Structural and Molecular Features of Sciatic Nerve Lesions in Diabetic Neuropathy: Unveiling Pathogenic Pathways and Targets

**Supplementary Table 6a.** List of the 32 unique proteins identified in the NLF-Ctrl (*Associated with Figure 3 & Supplementary Figure 5a*).

| Name                                                        | Symbol        | Location            | Type(s)                 |
|-------------------------------------------------------------|---------------|---------------------|-------------------------|
| ADP ribosylation factor like GTPase 6 interacting protein 5 | ARL6IP5       | Cytoplasm           | Other                   |
| Calreticulin                                                | CALR          | Cytoplasm           | Transcription regulator |
| Capping actin protein of muscle Z-line subunit alpha 1      | CAPZA1        | Cytoplasm           | Other                   |
| CD14 molecule                                               | CD14          | Plasma Membrane     | Transmembrane receptor  |
| Chloride intracellular channel 1                            | CLIC1         | Nucleus             | Ion channel             |
| Cathepsin B                                                 | CTSB          | Cytoplasm           | Peptidase               |
| Cytochrome b5 type A                                        | CYB5A         | Cytoplasm           | Enzyme                  |
| Dystrophin related protein 2                                | DRP2          | Plasma Membrane     | Other                   |
| Desmocollin 1                                               | DSC1          | Plasma Membrane     | Other                   |
| Desmoplakin                                                 | DSP           | Plasma Membrane     | Other                   |
| Eukaryotic translation elongation factor 1 delta            | EEF1D         | Cytoplasm           | Transcription regulator |
| Eukaryotic translation initiation factor 3 subunit A        | EIF3A         | Cytoplasm           | Transcription regulator |
| G protein subunit alpha 13                                  | GNA13         | Plasma Membrane     | Enzyme                  |
| Glypican 1                                                  | GPC1          | Plasma Membrane     | Transmembrane receptor  |
| Glutathione peroxidase 3                                    | GPX3          | Extracellular Space | Enzyme                  |
| Hypoxia up-regulated 1                                      | HYOU1         | Cytoplasm           | Other                   |
| Integrin subunit alpha V                                    | ITGAV         | Plasma Membrane     | Transmembrane receptor  |
| Lysosomal associated membrane protein 1                     | LAMP1         | Plasma Membrane     | Other                   |
| Niban apoptosis regulator 2                                 | NIBAN2        | Cytoplasm           | Transcription regulator |
| N-ethylmaleimide sensitive factor, vesicle fusing ATPase    | NSF           | Cytoplasm           | Transporter             |
| Poly(A) binding protein Cic 1                               | PABPC1        | Cytoplasm           | Transcription regulator |
| Progesterone receptor membrane component 2                  | PGRMC2        | Nucleus             | Transporter             |
| Arginyl aminopeptidase                                      | RNPEP         | Cytoplasm           | Peptidase               |
| Ribosomal protein L10a                                      | RPL10A        | Nucleus             | Other                   |
| Ribosomal protein L23a                                      | RPL23A        | Cytoplasm           | Other                   |
| Ribosomal protein S9                                        | RPS9          | Cytoplasm           | Translation regulator   |
| S100 calcium binding protein A1                             | S100A1        | Cytoplasm           | Other                   |
| Saccharopine dehydrogenase (putative)                       | SCCPDH        | Cytoplasm           | Other                   |
| Selenium binding protein 1                                  | SELENBP1      | Cytoplasm           | Other                   |
| Stathmin 2                                                  | STMN2         | Plasma Membrane     | Other                   |
| Transglutaminase 3                                          | TGM3          | Cytoplasm           | Enzyme                  |
| Thymosin beta 4 X-linked                                    | TMSB10/TMSB4X | Cytoplasm           | Other                   |
| Tubulin beta 6 class V                                      | TUBB6         | Cytoplasm           | Other                   |

**Supplementary Table 6b.** List of the 37 unique proteins identified in the NLF-T2D (*Associated with Figure 3 & Supplementary Figure 5b*).

| Name                                                                         | Symbol   | Location            | Type(s)                 |
|------------------------------------------------------------------------------|----------|---------------------|-------------------------|
| Actin gamma 1                                                                | ACTG1    | Cytoplasm           | Other                   |
| ATPase Na <sup>+</sup> /K <sup>+</sup> transporting subunit beta 1           | ATP1B1   | Plasma Membrane     | Transporter             |
| Carbonic anhydrase 1                                                         | CA1      | Cytoplasm           | Enzyme                  |
| Capping actin protein of muscle Z-line subunit beta                          | CAPZB    | Cytoplasm           | Other                   |
| Carbonyl reductase 3                                                         | CBR3     | Cytoplasm           | Enzyme                  |
| Chaperonin containing TCP1 subunit 5                                         | CCT5     | Cytoplasm           | Other                   |
| CD81 molecule                                                                | CD81     | Plasma Membrane     | Other                   |
| complement factor H related 1                                                | CFHR1    | Extracellular Space | Other                   |
| Chymase 1                                                                    | CMA1     | Extracellular Space | Peptidase               |
| Collagen type VIII alpha 1 chain                                             | COL8A1   | Extracellular Space | Other                   |
| Cysteine rich protein 2                                                      | CRIP2    | Nucleus             | Other                   |
| Dynamin 2                                                                    | DNM2     | Plasma Membrane     | Enzyme                  |
| Dihydropyrimidinase like 5                                                   | DPYSL5   | Cytoplasm           | Enzyme                  |
| Fatty acid binding protein 4                                                 | FABP4    | Cytoplasm           | Transporter             |
| F-box protein 2                                                              | FBXO2    | Cytoplasm           | Enzyme                  |
| Glia maturation factor beta                                                  | GMFB     | Cytoplasm           | Growth factor           |
| Internexin neuronal intermediate filament protein alpha                      | INA      | Cytoplasm           | Other                   |
| LIM and SH3 protein 1                                                        | LASP1    | Cytoplasm           | Transporter             |
| Myoglobin                                                                    | MB       | Cytoplasm           | Transporter             |
| Programmed cell death 6 interacting protein                                  | PDCD6IP  | Cytoplasm           | Other                   |
| Proliferation and apoptosis adaptor protein 15                               | PEA15    | Cytoplasm           | Transporter             |
| Prion protein                                                                | PRNP     | Plasma Membrane     | Other                   |
| PC4 and SFRS1 interacting protein 1                                          | PSIP1    | Nucleus             | Transcription regulator |
| RAB5B, member RAS oncogene family                                            | RAB5B    | Cytoplasm           | Enzyme                  |
| Rap1 GTPase-GDP dissociation stimulator 1                                    | RAP1GDS1 | Cytoplasm           | Other                   |
| Ribosomal protein L10                                                        | RPL10    | Cytoplasm           | Transcription regulator |
| Ribosomal protein S5                                                         | RPS5     | Cytoplasm           | Other                   |
| Serpin family B member 3                                                     | SERPINB3 | Cytoplasm           | Other                   |
| Serpin family B member 9                                                     | SERPINB9 | Cytoplasm           | Other                   |
| Serpin family F member 2                                                     | SERPINF2 | Extracellular Space | Other                   |
| Synuclein alpha                                                              | SNCA     | Cytoplasm           | Enzyme                  |
| Synuclein gamma                                                              | SNCG     | Cytoplasm           | Other                   |
| Versican                                                                     | VCAN     | Extracellular Space | Other                   |
| Tyrosine 3-monooxygenase/tryptophan 5-monooxygenase activation protein theta | YWHAQ    | Cytoplasm           | Other                   |

**Supplementary Table 6c.** List of the 43 unique proteins identified in the LF-T2D (*Associated with Figure 3 & Supplementary Figure 5c*).

| Name                                                                         | Symbol   | Location            | Type(s)                 |
|------------------------------------------------------------------------------|----------|---------------------|-------------------------|
| Actinin alpha 1                                                              | ACTN1    | Cytoplasm           | Transcription regulator |
| ADAM metallopeptidase domain 10                                              | ADAM10   | Plasma Membrane     | Peptidase               |
| Aldo-keto reductase family 7 member A2                                       | AKR7A2   | Cytoplasm           | Enzyme                  |
| Aldehyde dehydrogenase 7 family member A1                                    | ALDH7A1  | Cytoplasm           | Enzyme                  |
| Annexin A11                                                                  | ANXA11   | Nucleus             | Other                   |
| Apolipoprotein A2                                                            | APOA2    | Extracellular Space | Transporter             |
| Apolipoprotein C3                                                            | APOC3    | Extracellular Space | Transporter             |
| Actin related protein 2/3 complex subunit 2                                  | ARPC2    | Cytoplasm           | Other                   |
| Beta-2-microglobulin                                                         | B2M      | Plasma Membrane     | transmembrane receptor  |
| Complement C1q B chain                                                       | C1QB     | Extracellular Space | Other                   |
| Complement component 4 binding protein alpha                                 | C4BPA    | Extracellular Space | Other                   |
| Complement C8 beta chain                                                     | C8B      | Extracellular Space | Other                   |
| Complement factor D                                                          | CFD      | Extracellular Space | Peptidase               |
| Contactin 1                                                                  | CNTN1    | Plasma Membrane     | Enzyme                  |
| C-reactive protein                                                           | CRP      | Extracellular Space | Other                   |
| Catenin delta 1                                                              | CTNND1   | Nucleus             | Other                   |
| DEXH-box helicase 9                                                          | DHX9     | Nucleus             | Enzyme                  |
| FERM domain containing kindlin 2                                             | FERMT2   | Cytoplasm           | Other                   |
| Glyoxalase I                                                                 | GLO1     | Cytoplasm           | Enzyme                  |
| G protein subunit alpha 11                                                   | GNA11    | Plasma Membrane     | Enzyme                  |
| G protein subunit gamma 2                                                    | GNG2     | Plasma Membrane     | Enzyme                  |
| Ribosomal protein S15a                                                       | RPS15A   | Cytoplasm           | Other                   |
| Hexokinase 1                                                                 | HK1      | Cytoplasm           | kinase                  |
| Heterogeneous nuclear ribonucleoprotein M                                    | HNRNPM   | Nucleus             | Other                   |
| Lipopolysaccharide binding protein                                           | LBP      | Plasma Membrane     | Transporter             |
| Olfactomedin like 1                                                          | OLFML1   | Extracellular Space | Other                   |
| Papilin, proteoglycan like sulfated glycoprotein                             | PAPLN    | Extracellular Space | Other                   |
| Pyridoxal kinase                                                             | PDXK     | Cytoplasm           | kinase                  |
| Prohibitin 2                                                                 | PHB2     | Cytoplasm           | Transcription regulator |
| Protein phosphatase 1 catalytic subunit beta                                 | PPP1CB   | Cytoplasm           | Phosphatase             |
| Protein S                                                                    | PROS1    | Extracellular Space | Other                   |
| Prostaglandin D2 synthase                                                    | PTGDS    | Cytoplasm           | Enzyme                  |
| Ribosomal protein S2                                                         | RPS2     | Cytoplasm           | Other                   |
| Hydroxyacyl-CoA dehydrogenase trifunctional multienzyme complex subunit beta | HADHB    | Cytoplasm           | Enzyme                  |
| Ribosomal protein S20                                                        | RPS20    | Cytoplasm           | Other                   |
| Ribosomal protein S3A                                                        | RPS3A    | Nucleus             | Other                   |
| S100 calcium binding protein A11                                             | S100A11  | Cytoplasm           | Other                   |
| Serpin family D member 1                                                     | SERPIND1 | Extracellular Space | Other                   |
| Sorcin                                                                       | SRI      | Cytoplasm           | Transporter             |
| Stomatin                                                                     | STOM     | Plasma Membrane     | Other                   |
| Tubulointerstitial nephritis antigen like 1                                  | TINAGL1  | Extracellular Space | Transporter             |
| Tetraspanin 15                                                               | TSPAN15  | Plasma Membrane     | Other                   |

**Supplementary Figure 6.** STRING analysis of the predicted protein-protein interactions and functional clustering of the 32 unique proteins identified in NLF-Ctrl (a) (*Associated with Supplementary Tables 6a & 7a*); the 37 unique proteins identified in the NLF-T2D (b) (*Associated with Supplementary Tables 6b & 7b*), and the 43 unique proteins identified in the LF-T2D (c) (*Associated with Supplementary Tables 6c & 7c*). Cluster one is shown in red; Cluster two is shown in green and cluster three is shown in blue.

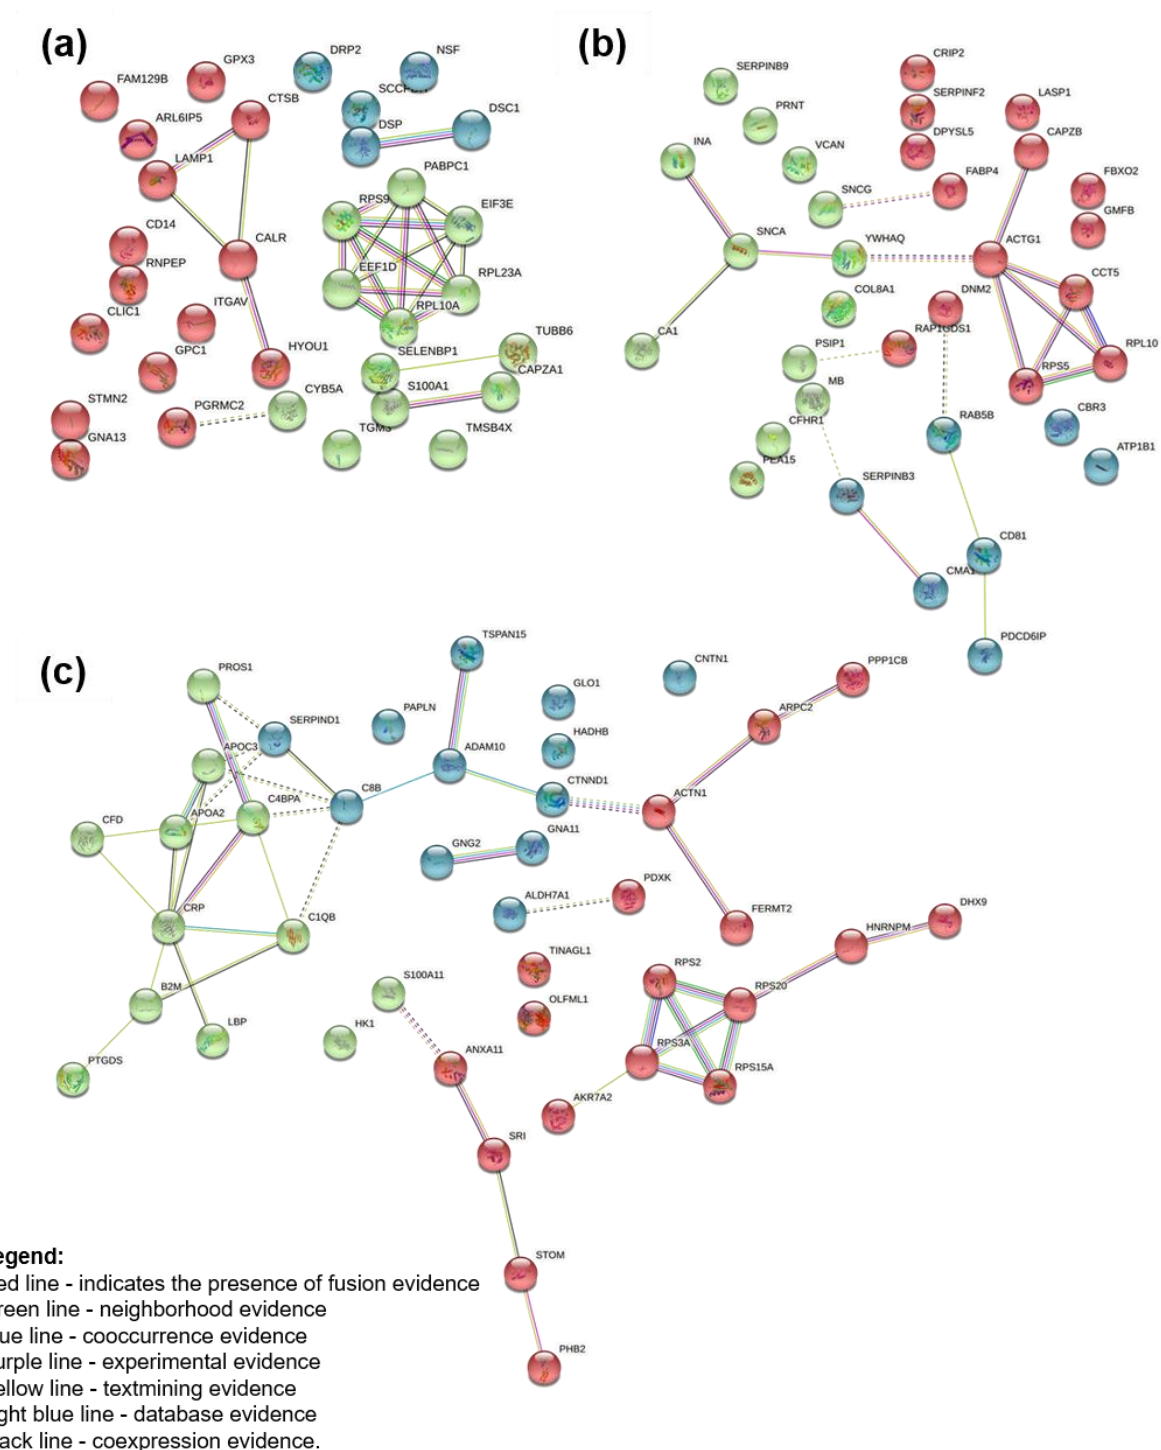

**Supplementary Information:** Schwarz et al., Exploring Structural and Molecular Features of Sciatic Nerve Lesions in Diabetic Neuropathy: Unveiling Pathogenic Pathways and Targets

**Supplementary Table 7a.** Functional and biological functional pathways identified for the 32 unique proteins identified in the NLF-Ctrl (*Associated with Supplementary Table 6a & Supplementary Figure 5a*).

| GO Term          | Term Description                                     | Observed Protein Count | Background Protein Count | Strength | False Discovery Rate (FDR) |
|------------------|------------------------------------------------------|------------------------|--------------------------|----------|----------------------------|
| <b>Cluster 1</b> |                                                      |                        |                          |          |                            |
| GO:0031982       | Vesicle                                              | 8                      | 3957                     | 0.70     | 0.0023                     |
| GO:0070062       | Extracellular exosome                                | 7                      | 2096                     | 0.92     | 0.0023                     |
| GO:0044194       | Cytolytic granule                                    | 2                      | 12                       | 2.61     | 0.0045                     |
| GO:0071682       | Endocytic vesicle lumen                              | 2                      | 23                       | 2.33     | 0.0110                     |
| GO:0005790       | Smooth endoplasmic reticulum                         | 2                      | 30                       | 2.22     | 0.0162                     |
| GO:0048471       | Perinuclear region of cytoplasm                      | 4                      | 727                      | 1.13     | 0.0239                     |
| GO:0030139       | Endocytic vesicle                                    | 3                      | 338                      | 1.34     | 0.0460                     |
| <b>Cluster 2</b> |                                                      |                        |                          |          |                            |
| GO:0045182       | Translation regulator activity                       | 4                      | 152                      | 1.94     | 0.00028                    |
| GO:0090079       | Translation regulator activity, nucleic acid binding | 3                      | 121                      | 1.91     | 0.0118                     |
| GO:0003735       | Structural constituent of ribosome                   | 3                      | 169                      | 1.77     | 0.0211                     |
| GO:0003723       | RNA binding                                          | 5                      | 1672                     | 0.99     | 0.0305                     |
| GO:0005198       | Structural molecule activity                         | 4                      | 776                      | 1.23     | 0.0338                     |
| <b>Cluster 3</b> |                                                      |                        |                          |          |                            |
| GO:0031982       | Vesicle                                              | 8                      | 3957                     | 0.70     | 0.0023                     |
| GO:0070062       | Extracellular exosome                                | 7                      | 2096                     | 0.92     | 0.0023                     |
| GO:0044194       | Cytolytic granule                                    | 2                      | 12                       | 2.61     | 0.0045                     |
| GO:0071682       | Endocytic vesicle lumen                              | 2                      | 23                       | 2.33     | 0.0110                     |
| GO:0005790       | Smooth endoplasmic reticulum                         | 2                      | 30                       | 2.22     | 0.0162                     |
| GO:0048471       | Perinuclear region of cytoplasm                      | 4                      | 727                      | 1.13     | 0.0239                     |
| GO:0030139       | Endocytic vesicle                                    | 3                      | 338                      | 1.34     | 0.0460                     |



**Supplementary Information:** Schwarz et al., Exploring Structural and Molecular Features of Sciatic Nerve Lesions in Diabetic Neuropathy: Unveiling Pathogenic Pathways and Targets

**Supplementary Table 7b.** Functional and biological functional pathways identified for the 37 unique proteins identified in the NLF-T2D (*Associated with Supplementary Table 6b & Supplementary Figure 5b*).

| GO Term          | Term Description      | Observed Protein Count | Background Protein Count | Strength | False Discovery Rate (FDR) |
|------------------|-----------------------|------------------------|--------------------------|----------|----------------------------|
| <b>Cluster 1</b> |                       |                        |                          |          |                            |
| GO:0005576       | Extracellular region  | 11                     | 4166                     | 0.60     | 0.0035                     |
| GO:0005615       | Extracellular space   | 10                     | 3195                     | 0.67     | 0.0035                     |
| <b>Cluster 2</b> |                       |                        |                          |          |                            |
| GO:0005576       | Extracellular region  | 11                     | 4166                     | 0.6      | 0.0035                     |
| GO:0005615       | Extracellular space   | 10                     | 3195                     | 0.67     | 0.0035                     |
| <b>Cluster 3</b> |                       |                        |                          |          |                            |
| GO:0005615       | Extracellular space   | 7                      | 3195                     | 0.79     | 0.0053                     |
| GO:0001772       | Immunological synapse | 2                      | 37                       | 2.18     | 0.0457                     |

**Supplementary Table 7c.** Functional and biological functional pathways identified for the 43 unique proteins identified in the LF-T2D (*Associated with Supplementary Table 6c & Supplementary Figure 5c*).

| GO Term          | Term Description                                                        | Observed Protein Count | Background Protein Count | Strength | False Discovery Rate (FDR) |
|------------------|-------------------------------------------------------------------------|------------------------|--------------------------|----------|----------------------------|
| <b>Cluster 1</b> |                                                                         |                        |                          |          |                            |
| GO:0000380       | Alternative mRNA splicing, via spliceosome                              | 2                      | 18                       | 2.19     | 0.046                      |
| GO:0019083       | Viral transcription                                                     | 5                      | 115                      | 1.78     | 0.0002                     |
| GO:0006614       | SRP-dependent cotranslational protein targeting to membrane             | 4                      | 96                       | 1.77     | 0.0026                     |
| GO:0000184       | Nuclear-transcribed mRNA catabolic process, nonsense-mediated decay     | 4                      | 119                      | 1.67     | 0.0026                     |
| GO:0006413       | Translational initiation                                                | 4                      | 141                      | 1.6      | 0.0038                     |
| GO:0072594       | Establishment of protein localization to organelle                      | 5                      | 433                      | 1.21     | 0.0078                     |
| GO:0006518       | Peptide metabolic process                                               | 5                      | 503                      | 1.14     | 0.0116                     |
| <b>Cluster 2</b> |                                                                         |                        |                          |          |                            |
| GO:0097197       | Tetraspanin-enriched microdomain                                        | 2                      | 10                       | 2.45     | 0.0059                     |
| GO:0005834       | Heterotrimeric G-protein complex                                        | 2                      | 33                       | 1.93     | 0.0265                     |
| GO:0031234       | Extrinsic component of cytoplasmic side of plasma membrane              | 3                      | 94                       | 1.65     | 0.007                      |
| GO:0019897       | Extrinsic component of plasma membrane                                  | 4                      | 166                      | 1.53     | 0.0039                     |
| GO:0030027       | Lamellipodium                                                           | 3                      | 202                      | 1.32     | 0.0306                     |
| GO:0005925       | Focal adhesion                                                          | 5                      | 405                      | 1.24     | 0.0039                     |
| GO:0098978       | Glutamatergic synapse                                                   | 4                      | 361                      | 1.19     | 0.0124                     |
| GO:0031252       | Cell leading edge                                                       | 4                      | 425                      | 1.12     | 0.0207                     |
| <b>Cluster 3</b> |                                                                         |                        |                          |          |                            |
| GO:0060621       | Negative regulation of cholesterol import                               | 2                      | 2                        | 3.18     | 0.001                      |
| GO:0010903       | Negative regulation of very-low-density lipoprotein particle remodeling | 2                      | 3                        | 3.00     | 0.002                      |
| GO:0008228       | Opsonization                                                            | 2                      | 9                        | 2.52     | 0.007                      |
| GO:0034371       | Chylomicron remodeling                                                  | 2                      | 9                        | 2.52     | 0.007                      |
| GO:0034378       | Chylomicron assembly                                                    | 2                      | 10                       | 2.48     | 0.008                      |
| GO:0033700       | Phospholipid efflux                                                     | 2                      | 12                       | 2.40     | 0.011                      |
| GO:0006957       | Complement activation, alternative pathway                              | 2                      | 13                       | 2.36     | 0.012                      |
| GO:0043691       | Reverse cholesterol transport                                           | 2                      | 17                       | 2.25     | 0.017                      |
| GO:0060192       | Negative regulation of lipase activity                                  | 2                      | 17                       | 2.25     | 0.017                      |
| GO:0034375       | High-density lipoprotein particle remodeling                            | 2                      | 18                       | 2.22     | 0.018                      |
| GO:0006958       | Complement activation, classical pathway                                | 4                      | 38                       | 2.20     | 0.000                      |
| GO:0006956       | Complement activation                                                   | 5                      | 54                       | 2.14     | 0.000                      |
| GO:0033344       | Cholesterol efflux                                                      | 2                      | 23                       | 2.12     | 0.028                      |
| GO:0050995       | Negative regulation of lipid catabolic process                          | 2                      | 24                       | 2.10     | 0.029                      |
| GO:0030449       | Regulation of complement activation                                     | 4                      | 56                       | 2.03     | 0.000                      |
